# Supplementary material for: Prevalence of complementary and alternative medicine use among rheumatoid arthritis patients in Saudi Arabia
Source: PubMed Central journal article supplement — Saudi Pharm J. 2019 Jul 8;27(7):939–44. doi: 10.1016/j.jsps.2019.07.002 (PMC6978619; doi:10.1016/j.jsps.2019.07.002), 2019-07-08
Supplement: mmc1.pdf [file mmc1.pdf]

**Prevalence of Complementary and Alternative Medicine Use among Rheumatoid Arthritis Patients  
in Saudi Arabia**

**Data from Direct Patient Interview**

**1- Demographics:**

Patient initials (to be covered at analysis for confidentiality): \_\_\_\_\_, Research ID# \_\_\_\_\_

1.1 Age: \_\_\_\_\_

1.2 Gender of patient:

- Male (1)  
 Female (2)

1.3 Nationality:

- Saudi (1)  
 Non-Saudi: \_\_\_\_\_ (2)

|                                           |
|-------------------------------------------|
| ماهي جنسيتك؟                              |
| <input type="checkbox"/> سعودي            |
| <input type="checkbox"/> غير سعودي: _____ |

1.4 Where do you live?

- Riyadh. Address: \_\_\_\_\_, mobile number: \_\_\_\_\_ (1)  
 Outside Riyadh. (2)

1.5 Weight: \_\_\_\_\_, Height: \_\_\_\_\_, BMI: \_\_\_\_\_

**2- Social history:**

2.1 What is your marital status?

- Single (0)  
 Married (1)  
 Divorced (2)  
 Widow (3)  
 Other (4)

|                                |
|--------------------------------|
| ماهي حالتك الاجتماعية؟         |
| <input type="checkbox"/> أعزب  |
| <input type="checkbox"/> متزوج |
| <input type="checkbox"/> مطلق  |
| <input type="checkbox"/> أرمل  |
| <input type="checkbox"/> أخرى  |

2.2 Level of education:

- Illiterate (0)  
 Elementary school (1)  
 High school (2)  
 Diploma (3)  
 Post graduate (4)  
 University degree (5)

|                                      |
|--------------------------------------|
| ما هو مستواك التعليمي؟               |
| <input type="checkbox"/> غير متعلم   |
| <input type="checkbox"/> الابتدائي   |
| <input type="checkbox"/> الثانوية    |
| <input type="checkbox"/> دبلوم       |
| <input type="checkbox"/> دراسات عليا |
| <input type="checkbox"/> بكالوريوس   |

2.3 Are you an employee?

- Yes (1)  
 No (0)  
 Other (2)

|                               |
|-------------------------------|
| هل أنت موظف؟                  |
| <input type="checkbox"/> نعم  |
| <input type="checkbox"/> لا   |
| <input type="checkbox"/> أخرى |

2.4 What is your monthly personal or family income level?

- Less than 5000 (1)
- 5000-10000 (2)
- More than 10000 (3)
- Other (4)

ما هو متوسط دخلك أو دخل الأسرة المادي بالشهر؟

- أقل من ٥٠٠٠
- ٥٠٠٠ الى ١٠٠٠٠
- أكثر من ١٠٠٠٠
- أخرى

**3- Medical History:**

3.1 Since when do you have rheumatoid arthritis? \_\_\_\_\_

منذ متى بدأ عندك الروماتزم؟ \_\_\_\_\_

3.2 What is your current rheumatoid arthritis medication?

| Name of drug                   | Dose | Frequency |
|--------------------------------|------|-----------|
| Methotrexate                   |      |           |
| Hydrocortisone                 |      |           |
| Dexamethasone                  |      |           |
| Methylprednisolone             |      |           |
| PrednisONE                     |      |           |
| PredniSONE                     |      |           |
| Cortisone                      |      |           |
| Cyclophosphamide (Cytoxan)     |      |           |
| Azathioprine (Imuran)          |      |           |
| Mycophenolate (CellCept)       |      |           |
| Gold                           |      |           |
| Immunoglobulin                 |      |           |
| Infliximab ( Humira)           |      |           |
| Etanercept (Enbrel)            |      |           |
| Rituximab (Rituxan)            |      |           |
| Hydroxychloroquine (Plaquenil) |      |           |
| Sulfasalazine (Azulfidine)     |      |           |
| Leflunomide (Arava)            |      |           |
| Anakinra (Kineret)             |      |           |
| Adalimumab (Amjevita)          |      |           |
| Analgesics ( specify):         |      |           |
| Others:                        |      |           |

3.3 Charlson co-morbidity index scoring (CCI):

| Condition                             | Points |
|---------------------------------------|--------|
| Myocardial infarction                 | 1      |
| Congestive heart failure              | 1      |
| Peripheral vascular disease or bypass | 1      |
| Cerebrovascular disease               | 1      |

|                                          |   |
|------------------------------------------|---|
| Hemiplegia                               | 2 |
| Pulmonary disease / asthma               | 1 |
| Diabetes mellitus                        | 1 |
| Diabetes with end-organ damage           | 2 |
| Renal disease                            | 2 |
| Mild liver disease                       | 2 |
| Severe liver disease                     | 3 |
| Gastric or peptic ulcer                  | 1 |
| Cancer (lymphoma, leukemia, solid tumor) | 2 |
| Metastatic solid tumor                   | 6 |
| Dementia or Alzheimer's                  | 1 |
| Rheumatic or connective tissue disease   | 1 |
| HIV or AIDS                              | 6 |
| Hypertension                             | 1 |
| Skin ulcer/ cellulites                   | 2 |
| Depression                               | 1 |
| Warfarin                                 | 1 |
| <b>Total Score:</b>                      |   |

#### 4- Alternative medication use:

The term “alternative medicine” defined as any product, including herbal remedies, vitamins, minerals, and natural products, that may be purchased without a prescription for the purpose of self-treatment.

المستحضرات التكميلية العشبية تعرف بأنه أي منتج يحتوي على العلاجات العشبية، الفيتامينات، المعادن، والمنتجات الطبية التي يمكن شراؤها دون وصفة طبية لغرض العلاج الذاتي.

4.1 Have you used any type of alternative medication?

- Yes (1)  
 No (0)

\*If no, go to question number 4.6. If yes, continue until the end.

هل تستخدم أي نوع من المستحضرات التكميلية العشبية؟

نعم

لا

\* إذا كانت إجابتك بلا انتقل إلى السؤال رقم ٤.٦ وإذا كانت

إجابتك بنعم أكمل للنهية.

4.2 Below is a list of alternative medication have used to treat rheumatoid arthritis. Which ones you have used since the disease started?

| Herbal or Plant-Derived Products | Minerals, chemicals, or hormones | Vitamins                           | Dosage form and rout of administration | Frequency |
|----------------------------------|----------------------------------|------------------------------------|----------------------------------------|-----------|
| Grape seed بذور العنب            | Calcium الكالسيوم                | Multivitamins الفيتامينات المتعددة |                                        |           |
| Cranberry توت بري                | Glucosamine الجلوكوزامين         | Vitamin C فيتامين ج                |                                        |           |
| Garlic ثوم                       | Magnesium مغنيسيوم               | Vitamin E فيتامين هـ               |                                        |           |
| Cress رشاد                       |                                  | Vitamin D فيتامين د                |                                        |           |

|                                                         |                                                                          |                                        |  |  |
|---------------------------------------------------------|--------------------------------------------------------------------------|----------------------------------------|--|--|
| Herbal teas or green tea<br>شاي الأعشاب أو الشاي الأخضر | Zinc الزنك                                                               | Vitamin B complex<br>فيتامين ب المعقدة |  |  |
| Cinnamon القرفة                                         | Iron الحديد                                                              | Vitamin B6<br>فيتامين ب 6              |  |  |
| Ginseng الجنسنگ                                         | Cod liver oil زيت كبد السمك القد                                         | Vitamin A فيتامين أ                    |  |  |
| Chamomile بابونج                                        | Fish oil/ Omega 3 fatty acids<br>زيت السمك / الأحماض الدهنية<br>أوميغا 3 | Vitamin B1<br>فيتامين ب 1              |  |  |
| Papaya ثمرة البابايا                                    | Sodium الصوديوم                                                          | Vitamin B12<br>فيتامين ب 12            |  |  |
| Peppermint tea شاي النعناع                              | Melatonin الميلاتونين                                                    | Centrum سنتروم                         |  |  |
| Black seed حبة البركة                                   | Potassium البوتاسيوم                                                     |                                        |  |  |
| Fenugreek الحلبة                                        | Iodine اليود                                                             |                                        |  |  |
| Vinegar الخل                                            | Iron الحديد                                                              |                                        |  |  |
| Ginger زنجبيل                                           |                                                                          |                                        |  |  |
| Chili pepper الفلفل الحار                               |                                                                          |                                        |  |  |
| Myrrh المرة                                             |                                                                          |                                        |  |  |
| Curcuma الكركم                                          |                                                                          |                                        |  |  |
| Saffron زعفران                                          |                                                                          |                                        |  |  |
| Honey عسل                                               |                                                                          |                                        |  |  |
| Others:                                                 | Others:                                                                  | Others:                                |  |  |

#### 4.3 Where do you buy alternative medicine(s)? (you can choose more than one answer)

- Health food store (1)
- Pharmacy (2)
- Online (3)
- From attar (4)
- Other (please specify): \_\_\_\_\_ (5)

من أين تشتري المستحضرات التكميلية العشبية؟ (تستطيع اختيار أكثر من أجا به)

- محلات غذاء صحي
- الصيدلية
- عبر الإنترنت
- محلات العطارة

#### 4.4 Where did you find out about the alternative medicine(s)? (you can choose more than one answer)

- Advertisement (1)
- Television (2)
- Newspaper (3)
- Magazine (4)
- Store display (5)
- Friend or Family member (6)
- Pharmacist (7)
- Medical doctor (8)
- Social media (9)

من أين لك معرفة عن المستحضرات التكميلية العشبية؟ (تستطيع اختيار أكثر من أجا به)

- إعلانات
- التلفزيون
- جريدة
- مجلة
- عروض متجر
- الأصدقاء أو العائلة

- Other (please specify): \_\_\_\_\_ (10)

الأطباء  
 الصيدلية  
 وسائل التواصل الاجتماعي  
 أخرى (حدد): \_\_\_\_\_

4.5 Why do you use alternative medicines?  
(you can choose more than one answer)

- Dissatisfied with conventional disease state management (1)  
 Added benefits of alternative medicine (2)  
 Distrust of conventional medicine (3)  
 Other (please specify): \_\_\_\_\_ (4)

لماذا تستخدم المستحضرات التكميلية العشبية؟ (تستطيع اختيار أكثر من أجابه)  
 غير راضي عن أدوية الروماتزم التقليدية.  
 إضافة فائدة.  
 عدم الثقة في أدوية الروماتزم التقليدية.

4.6 Given the statement: “Alternative medicines are safe”,  
by using Likert scales do you ....

- ① Strongly Agree      ② Agree      ③ Neither      ④ Disagree      ⑤ Strongly Disagree

5- Laboratory data collection sheet:

| Name of test                      | Baseline |  |
|-----------------------------------|----------|--|
| <b>Disease activity markers</b>   |          |  |
| ESR                               |          |  |
| CRP                               |          |  |
| Seropositive (RF and/or Anti-CCP) |          |  |
| <b>Lipid profile</b>              |          |  |
| TC                                |          |  |
| LDL                               |          |  |
| HDL                               |          |  |
| TG                                |          |  |
| <b>Glucose</b>                    |          |  |
| Fasting                           |          |  |
| Hb A1c                            |          |  |
| <b>Liver function tests</b>       |          |  |
| ALT                               |          |  |
| AST                               |          |  |

|                             |  |  |
|-----------------------------|--|--|
| Billirubine                 |  |  |
| Albumin                     |  |  |
| <b>Bone profile</b>         |  |  |
| Ca                          |  |  |
| Alk phosph                  |  |  |
| <b>Complete blood count</b> |  |  |
| WBC                         |  |  |
| Retcs                       |  |  |
| Hgb                         |  |  |
| <b>Others</b>               |  |  |
| Uric acid                   |  |  |
| Serum Creatinine            |  |  |
| Homocysteine                |  |  |
| Folic Acid                  |  |  |

## 6- Arabic Health Assessment Questionnaire (HAQ)

أسئلة تقييم الصحة لمرضى الروماتزم  
الرجاء الإجابة على جميع الأسئلة-شكرا

| لا أستطيع | بصعوبة شديدة | مع بعض الصعوبة | بسهولة | الأسئلة                                                                                                                                                           | الأنشطة                  |
|-----------|--------------|----------------|--------|-------------------------------------------------------------------------------------------------------------------------------------------------------------------|--------------------------|
|           |              |                |        | هل تستطيع:<br>أ-ارتداء ملابسك و ربط حذائك؟<br>ب-غسل شعرك بالشامبو؟                                                                                                | اللبس و الاهتمام بالمظهر |
|           |              |                |        | هل تستطيع:<br>أ-الوقوف بعد جلوسك على كرسي عادي بدون مساندة جانبية؟<br>ب-الاستلقاء على السرير للنوم و القيام من على السرير الصباح؟                                 | القيام                   |
|           |              |                |        | هل تستطيع:<br>أ-تقطيع اللحم و الخضروات و الفاكهة بالسكين؟<br>ب-رفع فنجان أو كوب ممتلئ الى فمك لتشرب؟<br>ج-فتح علبة حليب (لين) جديدة؟                              | تناول الطعام             |
|           |              |                |        | هل تستطيع:<br>أ-السير على ارض مستوية خارج المنزل؟<br>ب-صعود خمس درجات من السلم؟                                                                                   | السير                    |
|           |              |                |        | هل تستطيع:<br>أ-غسل و تنشيف جسمك بأكمله؟<br>ب-الاستحمام في البانيو؟<br>ج-الجلوس و القيام على التواليت (مراض أفرنجي)؟                                              | النظافة الشخصية          |
|           |              |                |        | هل تستطيع:<br>أ-تناول أشياء بوزن كيلوجرامين (مثل كيس سكر) من مستوى أعلى من رأسك؟<br>ب-الانحناء لالتقاط ملابس من على الأرض؟                                        | التناول                  |
|           |              |                |        | هل تستطيع:<br>أ-فتح باب السيارة؟<br>ب-فتح برطمان اعلية (مربى) سبق فتحها؟<br>ج-فتح و غلق حنفية المياه؟                                                             | الامساك                  |
|           |              |                |        | هل تستطيع:<br>أ-التسوق/التجول في المحلات؟<br>ب-الركوب أو النزول من السيارة؟<br>ج-الصلاة من الوضع واقفا (الركوع و السجود)،<br>القيم بالأعمال المنزلية مثل التنظيف؟ | أنشطة أخرى               |

فضلا ضع علامة ✓ أمام أي من الأجهزة المساعدة والتي تحتاجها عادة لأداء أي من الأنشطة:

- عصا
- مشاية
- عكاز
- كرسي متحرك بعجل
- أجهزه للمساعدة في ارتداء الملابس (مثل خطاف ماسك للزائر، ذراع لشد السوسته-السحاب\باي-، عصا بذراع طويلة للمساعدة في لبس الأحذية)
- أدوات خاصة أو مصنعة أخرى
- كرسي مصنع خصيصا للجلوس
- أشياء أخرى (اذكرها: .....

فضلا ضع علامة ✓ أمام أي من هذه الأنشطة والتي عادة تحتاج الى مساعدة شخص آخر لعملها:

- اللبس والاهتمام بالمظهر
- تناول الطعام
- القيام
- السير

فضلا ضع علامة ✓ أمام أي من الأجهزة المساعدة والتي تحتاجها عادة لأداء أي من هذه الأنشطة:

- مقعد عالي للتواليت (المرحاض الأفرنجي)
- مقعد للاستحمام في البانيو
- فاتح للعلب (التي فتحت من قبل)
- قضيب ساند للاستحمام في البانيو
- ذراع ذات يد طويلة للإمساك بالأشياء
- ذراع ذات يد طويلة للمساعدة في الاستحمام
- أشياء أخرى (اذكرها: .....

فضلا ضع علامة ✓ أمام أي من هذه الأنشطة والتي عادة تحتاج الى مساعدة شخص آخر لعملها:

- النظافة الشخصية
- تناول
- الإمساك وفتح الأشياء
- التسوق والقيام بالأعمال المنزلية

عندما تصف درجة الألم الذي تشعر به (خلال الأسبوع الماضي بصفة عامة). ماهي الدرجة التي تعطيها لنفسك والتي تعبر عن شدة الألم الذي تشعر به نتيجة مرضك؟  
فضلا ضع علامة لتشير الى الدرجة التي تعبر عن شدة الألم

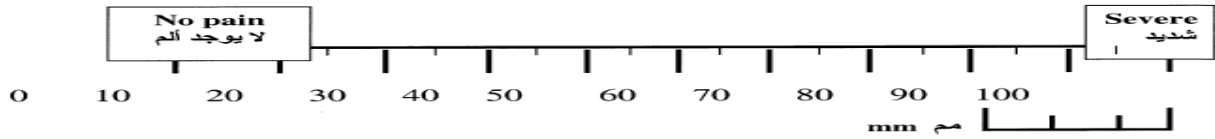

عندما تقيم مدى تأثير التهاب المفاصل على حياتك ماهي الدرجة التي تعطيها لنفسك؟

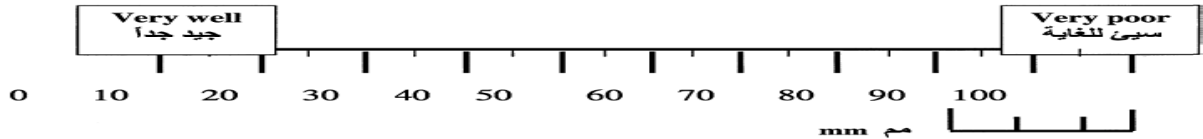

لتصلب الصباح: عند الاستيقاظ في الصباح الأسبوع الماضي هل واجهتك مشكلة في تقييد حركة المفاصل أو ببطء في تحريك المفاصل

□ نعم، من الاستيقاظ حتى يحدث الحد الأقصى للتحسن كم دقيقة يستغرق هذا الاحساس؟

في أي وقت مضى كان لديك هذا الإحساس لأكثر من ساعة واحدة في كل صباح لأكثر من 6 أشهر؟ □ نعم □ لا

□ لا
